# Supplementary material for: A single H/ACA small nucleolar RNA mediates tumor suppression downstream of oncogenic RAS
Source: eLife journal article supplement (doi:10.7554/elife.48847), 2019-09-03
Supplement: supp [file elife_poa_e48847_Figure_1_figure_supplement_2_source_data_1.xlsx]

## Sheet: Sheet1
Figure 1-figure supplement 2-source data 1. H/ACA snoRNA levels in human cancer
Name (cancer type)	P value	Average Tumor	Average Non-tumor	Log2 Fc
SNORA17 (HCC)	1.28818e-11	2.63638	1.53518	0.780155
SNORA24 (HCC)	1.34703e-09	0.839591	1.21607	-0.534463
SNORA72 (HCC)	2.17792e-08	0.470607	0.311296	0.596237
SNORA67 (HCC)	4.55463e-07	0.576472	0.854117	-0.567182
SNORA14B (HCC)	1.0478e-06	0.0406829	0.020617	0.980585
SNORA81 (HCC)	5.60107e-06	0.0259232	0.0187915	0.464166
SNORA65 (HCC)	1.45494e-05	0.0585446	0.044295	0.402391
SNORA3 (HCC)	0.00010002	0.0592721	0.0487883	0.280818
SNORA4 (HCC)	0.0001566	0.0523423	0.0338823	0.627445
SNORA75 (HCC)	0.000177152	0.0476091	0.0613385	-0.365557
SNORA45 (HCC)	0.000586419	0.274352	0.21289	0.365919
SNORA20 (HCC)	0.000648967	0.168137	0.222144	-0.401851
SNORA6 (HCC)	0.00237691	0.0418139	0.0309557	0.433777
SNORA46 (HCC)	0.00290744	0.0163696	0.0148194	0.143528
SNORA18 (HCC)	0.00502788	0.0891766	0.0607051	0.554848
SNORA74B (HCC)	0.00566286	0.105271	0.0864452	0.284252
SNORA23 (HCC)	0.00603348	0.0643454	0.031079	1.0499
SNORA79 (HCC)	0.0453269	0.0173893	0.0116171	0.581947
SNORA71B (HCC)	0.0521834	0.0116613	0.010261	0.184561
SNORA29 (HCC)	0.0819557	0.0605693	0.0647605	-0.0965285
SNORA2A (HCC)	0.087029	0.0168148	0.0182659	-0.119421
SNORA64 (HCC)	0.0959868	0.172406	0.15307	0.171625
SNORA11 (HCC)	0.109623	0.101644	0.0934576	0.121146
SNORA19 (HCC)	0.189314	0.0269414	0.0235625	0.193332
SNORA71D (HCC)	0.2013	0.0185175	0.0195062	-0.0750419
SNORA66 (HCC)	0.326772	0.141433	0.133264	0.0858346
SNORA8 (HCC)	0.421488	0.28572	0.296621	-0.0540211
SNORA38 (HCC)	0.547949	0.126104	0.129888	-0.0426487
SNORA47 (HCC)	0.598003	0.110331	0.108542	0.0235847
SNORA71A (HCC)	0.647124	0.0220915	0.0217658	0.0214274
SNORA42 (HCC)	0.666146	0.150586	0.147471	0.0301609
SNORA5B (HCC)	0.759051	0.0465858	0.0470403	-0.0140079
SNORA53 (HCC)	0.776553	0.0329881	0.0323596	0.0277509
SNORA77 (HCC)	0.839355	0.0341689	0.0345296	-0.0151469
SNORA76 (HCC)	0.896179	0.140676	0.140188	0.00501912
SNORA74A (HCC)	0.967757	0.0320536	0.0319998	0.00242337
SNORA70F (DLBCL)	6.27e-10	5.35362	4.51537	0.245669
SNORA45B (DLBCL)	1.18e-08	7.8681	8.66144	-0.138592
SNORA56 (DLBCL)	1.28e-08	8.9482	9.57781	-0.0980977
SNORA21 (DLBCL)	1.75e-08	9.31022	10.1589	-0.125864
SNORA62 (DLBCL)	4.58e-07	11.5914	11.9664	-0.0459379
SNORA74A (DLBCL)	5.29e-07	8.59949	9.49944	-0.143592
SNORA52 (DLBCL)	7.64e-07	11.9264	12.4808	-0.0655522
SNORA5B (DLBCL)	9.94e-07	8.96203	9.37362	-0.0647808
SNORA29 (DLBCL)	1.24e-06	10.9779	11.6524	-0.0860216
SNORA27 (DLBCL)	2.75e-06	10.4777	10.9679	-0.0659699
SNORA71C (DLBCL)	3.42e-06	11.2763	11.7531	-0.0597545
SNORA41 (DLBCL)	3.7e-06	7.69775	8.15322	-0.0829329
SNORA40 (DLBCL)	2.13e-05	8.63141	9.34986	-0.115348
SNORA48 (DLBCL)	3.52e-05	10.4924	10.8846	-0.0529476
SNORA45A (DLBCL)	3.9e-05	7.86479	8.28113	-0.0744193
SNORA71A (DLBCL)	6.14e-05	10.3033	10.8259	-0.0713804
SNORA22 (DLBCL)	0.000150922	11.4672	11.8145	-0.0430436
SNORA35 (DLBCL)	0.000249223	6.74334	6.3365	0.0897766
SNORA37 (DLBCL)	0.000394654	11.1121	10.1944	0.12436
SNORA36C (DLBCL)	0.000445779	5.5341	5.01808	0.141213
SNORA64 (DLBCL)	0.000502984	12.4411	12.6938	-0.0290183
SNORA15 (DLBCL)	0.00057104	6.94574	6.50301	0.0950208
SNORA36A (DLBCL)	0.000581724	6.06594	5.4275	0.160444
SNORA54 (DLBCL)	0.000650884	9.24287	8.27637	0.159341
SNORA9 (DLBCL)	0.000719924	9.51054	9.98194	-0.0697929
SNORA67 (DLBCL)	0.00109922	12.0344	10.1361	0.247662
SNORA49 (DLBCL)	0.00120157	8.80566	8.20188	0.102476
SNORA13 (DLBCL)	0.00131628	7.20054	7.57623	-0.0733761
SNORA11E (DLBCL)	0.00229119	7.91204	7.1802	0.140026
SNORA33 (DLBCL)	0.00267708	5.57221	6.10006	-0.130574
SNORA60 (DLBCL)	0.00272407	9.47223	8.61478	0.13689
SNORA7B (DLBCL)	0.00314235	10.5185	9.8467	0.0952174
SNORA70E (DLBCL)	0.00440724	7.99204	7.33738	0.1233
SNORA61 (DLBCL)	0.00461665	9.78644	10.1181	-0.0480884
SNORA73A (DLBCL)	0.0053432	11.7273	12.0584	-0.0401764
SNORA59B (DLBCL)	0.00534727	7.54014	7.22958	0.0606783
SNORA71D (DLBCL)	0.00678805	12.9657	13.1907	-0.0248233
SNORA70C (DLBCL)	0.00734833	6.65601	6.33922	0.0703505
SNORA32 (DLBCL)	0.0109584	10.7713	11.1587	-0.0509825
SNORA44 (DLBCL)	0.0121705	8.46179	8.10781	0.0616497
SNORA58 (DLBCL)	0.0128009	6.65945	6.18932	0.105622
SNORA5A (DLBCL)	0.015093	8.27364	8.62016	-0.0591921
SNORA23 (DLBCL)	0.0153641	12.7165	12.9691	-0.0283791
SNORA4 (DLBCL)	0.0198538	8.08375	8.40565	-0.0563332
SNORA69 (DLBCL)	0.0209589	4.3352	4.53986	-0.0665504
SNORA55 (DLBCL)	0.0306352	8.81488	8.47872	0.0560945
SNORA46 (DLBCL)	0.0318795	7.37547	6.7943	0.118411
SNORA70D (DLBCL)	0.0384922	6.47842	6.25105	0.0515444
SNORA16B (DLBCL)	0.0427098	6.01793	5.69102	0.0805801
SNORA70B (DLBCL)	0.0549088	6.81078	6.42842	0.0833564
SNORA80E (DLBCL)	0.0651316	10.843	10.0777	0.105599
SNORA5C (DLBCL)	0.0677746	8.46695	8.2594	0.0358047
SNORA76A (DLBCL)	0.0717562	10.7947	10.5341	0.0352609
SNORA10 (DLBCL)	0.0877438	9.99324	10.2365	-0.0346968
SNORA1 (DLBCL)	0.0930649	9.59555	9.06129	0.0826494
SNORA20 (DLBCL)	0.0935331	10.9722	10.578	0.0527789
SNORA14A (DLBCL)	0.0949863	7.6614	7.32796	0.0641962
SNORA71E (DLBCL)	0.111288	7.77607	7.62889	0.0275678
SNORA80B (DLBCL)	0.118671	8.16525	7.95361	0.0378859
SNORA80A (DLBCL)	0.119203	8.46184	8.2524	0.0361586
SNORA8 (DLBCL)	0.126682	10.4835	10.3124	0.0237418
SNORA16A (DLBCL)	0.136448	12.1942	12.0237	0.0203033
SNORA14B (DLBCL)	0.139543	7.46044	7.09188	0.0730928
SNORA19 (DLBCL)	0.144155	6.14223	5.86365	0.0669652
SNORA71B (DLBCL)	0.161855	10.38	10.6121	-0.0319005
SNORA63 (DLBCL)	0.17486	7.92502	8.14533	-0.0395579
SNORA68 (DLBCL)	0.299602	11.8253	11.731	0.0115536
SNORA75 (DLBCL)	0.332244	9.78685	10.018	-0.033684
SNORA6 (DLBCL)	0.387986	8.45286	8.57776	-0.0211616
SNORA28 (DLBCL)	0.39126	6.56864	6.67161	-0.0224395
SNORA31 (DLBCL)	0.392205	7.09364	7.01506	0.0160701
SNORA70G (DLBCL)	0.437352	7.20533	7.05559	0.0302973
SNORA70 (DLBCL)	0.565258	11.651	11.743	-0.0113509
SNORA51 (DLBCL)	0.573872	7.77341	7.83171	-0.0107802
SNORA30 (DLBCL)	0.679364	6.18391	6.22697	-0.010013
SNORA2A (DLBCL)	0.782695	6.73325	6.67537	0.0124546
SNORA24 (DLBCL)	0.79331	11.0849	11.1242	-0.00510778
SNORA38 (DLBCL)	0.84312	8.51237	8.53173	-0.00327794
SNORA65 (DLBCL)	0.929137	8.96356	8.9474	0.00260378
SNORA57 (DLBCL)	0.978312	9.93592	9.93054	0.000781241
SNORA38B (DLBCL)	0.987139	11.6769	11.6805	-0.000438445
SNORA2B (DLBCL)	0.996944	5.06278	5.06305	-7.73e-05
SNORA56 (CRC)	5.92e-23	9.57487	8.24492	0.215746
SNORA5B (CRC)	5.65e-20	7.66952	6.41925	0.25673
SNORA9 (CRC)	7.7e-19	6.62181	5.15208	0.36207
SNORA43 (CRC)	3.69e-14	7.65393	6.40279	0.257501
SNORA76C (CRC)	5.27e-09	5.97057	5.30799	0.169705
SNORA70 (CRC)	1.02e-06	5.05874	4.12055	0.295943
SNORA68 (CRC)	5.72e-06	14.2287	12.6854	0.165632
SNORA21 (CRC)	7.77e-05	12.6006	11.729	0.103408
SNORA24 (CRC)	0.000938286	9.29144	8.7796	0.0817476
SNORA48 (CRC)	0.0010108	12.4716	12.0627	0.0480894
SNORA1 (CRC)	0.00250544	9.70501	9.14726	0.0853896
SNORA4 (CRC)	0.00962081	13.0354	13.3702	-0.0365825
SNORA45A (CRC)	0.0110072	3.49218	4.08582	-0.226495
SNORA29 (CRC)	0.019224	7.8628	8.58798	-0.127275
SNORA56 (CRC)	0.0373881	10.6414	10.1421	0.0693224
SNORA64 (CRC)	0.0785914	10.9509	10.8437	0.014185
SNORA60 (CRC)	0.0992716	5.55656	5.19256	0.0977442
SNORA41 (CRC)	0.54027	13.8351	13.7633	0.00750853
SNORA16A (CRC)	0.578461	6.94922	6.85589	0.0195071
SNORA67 (CRC)	0.883034	4.14165	4.15534	-0.00476002
SNORA55 (PDAC)	8.8e-11	4.95895	5.46907	-0.141261
SNORA13 (PDAC)	3.65e-07	3.25732	3.58967	-0.140164
SNORA5B (PDAC)	2.55e-06	4.66085	4.43003	0.0732774
SNORA2B (PDAC)	2.8e-06	3.30047	3.72702	-0.175351
SNORA27 (PDAC)	3.77e-06	8.95873	9.32615	-0.0579875
SNORA35 (PDAC)	1.61e-05	3.23163	3.62988	-0.167659
SNORA4 (PDAC)	1.77e-05	7.44501	6.99963	0.0889954
SNORA70F (PDAC)	2.67e-05	3.23007	3.63946	-0.172159
SNORA74A (PDAC)	5.33e-05	4.31208	3.90663	0.142459
SNORA80B (PDAC)	6.2e-05	4.63519	4.96784	-0.0999901
SNORA67 (PDAC)	9.81e-05	7.25182	6.65503	0.123899
SNORA41 (PDAC)	0.00013825	6.6788	7.04628	-0.0772734
SNORA16A (PDAC)	0.000226948	5.65517	5.24581	0.108404
SNORA75 (PDAC)	0.000258142	4.44857	4.78984	-0.106635
SNORA30 (PDAC)	0.000401743	2.97593	3.14265	-0.078641
SNORA61 (PDAC)	0.000628476	6.17345	5.81778	0.0856073
SNORA81 (PDAC)	0.00151466	6.07397	5.73421	0.0830445
SNORA14A (PDAC)	0.00180544	3.91085	4.10618	-0.0703154
SNORA37 (PDAC)	0.00183247	5.46719	5.60863	-0.0368494
SNORA44 (PDAC)	0.0022001	5.73376	5.49648	0.0609723
SNORA6 (PDAC)	0.00361323	6.92749	7.09521	-0.0345127
SNORA80E (PDAC)	0.00432971	6.31858	6.60222	-0.0633509
SNORA40 (PDAC)	0.00448067	5.51101	5.26391	0.0661829
SNORA18 (PDAC)	0.00466847	8.59464	8.32316	0.0463048
SNORA45A (PDAC)	0.00663618	4.79877	5.0185	-0.0645917
SNORA52 (PDAC)	0.0104965	7.88196	8.07403	-0.0347354
SNORA54 (PDAC)	0.0114884	3.71151	3.52284	0.0752665
SNORA28 (PDAC)	0.0117318	3.925	4.18167	-0.091387
SNORA24 (PDAC)	0.0143637	6.08578	6.31508	-0.0533567
SNORA48 (PDAC)	0.018917	7.99496	7.81063	0.033652
SNORA45B (PDAC)	0.0201688	4.83184	4.66236	0.0515114
SNORA57 (PDAC)	0.0289794	6.36295	6.50837	-0.0326015
SNORA70B (PDAC)	0.0291673	4.10295	3.97795	0.0446376
SNORA5A (PDAC)	0.0424305	5.06139	4.85041	0.0614288
SNORA22 (PDAC)	0.0426045	5.18573	5.33732	-0.0415672
SNORA71B (PDAC)	0.0446091	4.74292	4.89578	-0.0457623
SNORA64 (PDAC)	0.0449642	5.15802	5.3331	-0.0481545
SNORA8 (PDAC)	0.0483269	7.69669	7.52085	0.033341
SNORA56 (PDAC)	0.0498364	3.88974	3.75568	0.0505984
SNORA73A (PDAC)	0.0526005	7.56556	7.30427	0.0507072
SNORA29 (PDAC)	0.0642776	8.5398	8.43263	0.0182196
SNORA14B (PDAC)	0.0655996	4.46975	4.34308	0.0414739
SNORA38B (PDAC)	0.0743932	4.49087	4.5678	-0.0245024
SNORA59B (PDAC)	0.0761568	3.81526	3.91151	-0.0359433
SNORA33 (PDAC)	0.0805476	6.854	6.95356	-0.0208058
SNORA20 (PDAC)	0.110075	5.19227	5.35125	-0.0435104
SNORA1 (PDAC)	0.121915	6.33458	6.19344	0.032509
SNORA46 (PDAC)	0.128203	5.09825	4.98532	0.0323168
SNORA71D (PDAC)	0.135822	5.30515	5.43867	-0.0358591
SNORA65 (PDAC)	0.144126	4.96631	5.05846	-0.0265249
SNORA70E (PDAC)	0.145446	3.98817	4.09423	-0.0378647
SNORA7B (PDAC)	0.147983	6.00125	5.89478	0.0258262
SNORA51 (PDAC)	0.149363	3.41987	3.49481	-0.031273
SNORA70 (PDAC)	0.155373	11.2283	11.2947	-0.0085113
SNORA71E (PDAC)	0.160036	4.2213	4.29714	-0.02569
SNORA21 (PDAC)	0.160563	5.70123	5.5889	0.028711
SNORA16B (PDAC)	0.166533	3.25034	3.16518	0.0383047
SNORA68 (PDAC)	0.187512	9.53488	9.60017	-0.0098445
SNORA36C (PDAC)	0.188107	2.48802	2.54904	-0.034959
SNORA60 (PDAC)	0.192269	4.36926	4.47631	-0.0349219
SNORA10 (PDAC)	0.200655	5.69455	5.7872	-0.0232848
SNORA2A (PDAC)	0.203821	2.24327	2.3049	-0.0391002
SNORA9 (PDAC)	0.211932	5.31647	5.45251	-0.0364523
SNORA5C (PDAC)	0.25257	5.00082	4.92375	0.0224065
SNORA80A (PDAC)	0.263352	5.196	5.26141	-0.0180486
SNORA11D (PDAC)	0.281052	4.87436	4.79558	0.0235057
SNORA71A (PDAC)	0.31054	4.65835	4.56867	0.0280451
SNORA36A (PDAC)	0.318685	1.92655	1.97559	-0.0362658
SNORA70G (PDAC)	0.322302	4.72181	4.64706	0.0230209
SNORA69 (PDAC)	0.392427	1.89892	1.86444	0.0264437
SNORA76A (PDAC)	0.397617	6.35739	6.28439	0.0166632
SNORA49 (PDAC)	0.405714	4.52404	4.57728	-0.0168795
SNORA19 (PDAC)	0.430963	2.53539	2.58633	-0.0286979
SNORA70D (PDAC)	0.548171	3.59085	3.63411	-0.017276
SNORA70C (PDAC)	0.578612	3.39133	3.44431	-0.022363
SNORA62 (PDAC)	0.726228	4.98737	5.0258	-0.0110727
SNORA71C (PDAC)	0.766975	5.16498	5.14587	0.00534812
SNORA31 (PDAC)	0.773033	5.19252	5.17079	0.00605201
SNORA23 (PDAC)	0.781187	7.60908	7.58652	0.00428407
SNORA15 (PDAC)	0.815514	4.32516	4.33938	-0.00473461
SNORA58 (PDAC)	0.844295	2.73675	2.74407	-0.0038527
SNORA38 (PDAC)	0.905823	5.23344	5.24167	-0.00226685
SNORA71A (LUAD)	4.79e-15	10.0337	8.84728	0.181553
SNORA71C (LUAD)	2.32e-13	9.88029	8.55474	0.207829
SNORA70E (LUAD)	3.11e-13	6.75337	6.27327	0.106391
SNORA56 (LUAD)	5.79e-13	7.40316	6.3081	0.230936
SNORA70C (LUAD)	5.42e-12	5.73933	5.42895	0.0802097
SNORA74A (LUAD)	1.18e-09	8.95739	7.90729	0.179896
SNORA68 (LUAD)	1.7e-07	12.6233	12.2323	0.0453999
SNORA71D (LUAD)	3.4e-07	13.0432	12.5072	0.0605391
SNORA5A (LUAD)	5.28e-07	8.5127	7.95536	0.0976899
SNORA16B (LUAD)	2.47e-06	6.03985	6.76604	-0.163801
SNORA73A (LUAD)	4.22e-06	12.7585	12.2098	0.0634296
SNORA80A (LUAD)	9.83e-06	8.61687	8.17611	0.0757496
SNORA65 (LUAD)	3.13e-05	9.45738	8.68282	0.123277
SNORA24 (LUAD)	3.41e-05	11.7238	11.189	0.0673548
SNORA23 (LUAD)	6.99e-05	12.6678	12.3514	0.0364928
SNORA22 (LUAD)	8.17e-05	11.2849	10.9848	0.0388874
SNORA62 (LUAD)	0.000121566	9.41319	8.57349	0.134802
SNORA70F (LUAD)	0.000162917	5.7887	6.14483	-0.0861327
SNORA61 (LUAD)	0.000255563	10.9471	10.4723	0.0639608
SNORA69 (LUAD)	0.000307877	5.1334	4.68771	0.131031
SNORA9 (LUAD)	0.001608	10.1962	9.64138	0.0807203
SNORA80B (LUAD)	0.00195942	8.37365	8.02939	0.0605656
SNORA57 (LUAD)	0.002368	10.0729	9.62959	0.0649286
SNORA71B (LUAD)	0.00573987	11.2448	10.7298	0.0676444
SNORA48 (LUAD)	0.00735855	11.1728	10.9271	0.0320776
SNORA70D (LUAD)	0.00839916	5.98755	5.85521	0.0322451
SNORA14A (LUAD)	0.00995512	10.3955	10.9212	-0.0711805
SNORA55 (LUAD)	0.0120148	9.53935	9.16359	0.0579771
SNORA75 (LUAD)	0.0137323	9.63037	9.26571	0.0556891
SNORA70B (LUAD)	0.0166343	6.39459	6.62109	-0.050217
SNORA20 (LUAD)	0.024131	11.5046	11.7315	-0.0281876
SNORA15 (LUAD)	0.0317389	6.78912	6.47888	0.0674798
SNORA5C (LUAD)	0.0476747	9.29168	8.99473	0.0468591
SNORA2B (LUAD)	0.050982	5.78403	5.93185	-0.0364092
SNORA46 (LUAD)	0.0520748	7.56444	7.30297	0.0507495
SNORA38B (LUAD)	0.0526943	9.25656	8.89653	0.0572345
SNORA19 (LUAD)	0.0669423	6.75673	6.58912	0.0362396
SNORA30 (LUAD)	0.0695348	5.88418	5.77396	0.0272803
SNORA35 (LUAD)	0.0827677	6.37914	6.2831	0.0218832
SNORA7B (LUAD)	0.0918637	11.499	11.7303	-0.0287308
SNORA28 (LUAD)	0.0963227	7.58771	7.86209	-0.0512478
SNORA45B (LUAD)	0.117199	8.86853	8.66162	0.0340584
SNORA70G (LUAD)	0.117763	6.8338	6.70014	0.028497
SNORA6 (LUAD)	0.156674	8.9771	8.76106	0.0351433
SNORA38 (LUAD)	0.180449	8.35811	8.20011	0.0275329
SNORA36C (LUAD)	0.217678	6.14485	6.04799	0.0229222
SNORA31 (LUAD)	0.237351	8.65232	8.53416	0.0198391
SNORA2A (LUAD)	0.252371	7.92631	7.73145	0.0359118
SNORA71E (LUAD)	0.440866	7.40287	7.36835	0.00674188
SNORA76A (LUAD)	0.454385	10.879	10.8236	0.0073655
SNORA58 (LUAD)	0.476287	6.8867	6.78897	0.0206205
SNORA37 (LUAD)	0.489838	10.9049	10.8314	0.00974586
SNORA54 (LUAD)	0.580229	9.78482	9.87767	-0.0136253
SNORA13 (LUAD)	0.585007	7.5295	7.41216	0.0226606
SNORA60 (LUAD)	0.691591	10.7223	10.7788	-0.00757509
SNORA80E (LUAD)	0.726557	11.6013	11.5492	0.00648938
SNORA49 (LUAD)	0.915646	9.86655	9.85444	0.00177099
SNORA14B (LUAD)	0.970076	8.70675	8.71262	-0.000972792
