# Supplementary material for: A single H/ACA small nucleolar RNA mediates tumor suppression downstream of oncogenic RAS
Source: eLife journal article supplement (doi:10.7554/elife.48847), 2019-09-03
Supplement: supp [file elife_poa_e48847_Figure_1_source_data_1.xlsx]

## Sheet: Sheet1
Figure 1-source data 1. H/ACA snoRNA levels upon oncogenic HRAS expression
snoRNA	Log2 Fold Change	P value
SNORA23	0.966039	0.000182075
SNORA48	1.51162	0.000244705
SNORA27	1.08631	0.00162409
SNORA64	0.970656	0.00297256
SNORA36C	-1.71291	0.00596747
SNORA22	1.20317	0.00639812
SNORA72	1.24682	0.00678486
SNORA32	0.522309	0.00742202
SNORA8	0.684283	0.00769421
SNORA26	1.67558	0.00772862
SNORA41	1.68203	0.00815857
SNORA24	0.604205	0.0108659
SNORA49	0.960861	0.0121503
SNORA53	-1.09529	0.0122095
SNORA71A	1.81365	0.0124434
SNORA61	0.509528	0.0131484
SNORA25	1.06185	0.0136818
SNORA67	1.27738	0.0172773
SNORA51	1.24834	0.0178568
SNORA70B	-1.62033	0.0213637
SNORA43	0.720767	0.0221055
SNORA66	0.921012	0.0224571
SNORA68	0.656962	0.0232129
SNORA45	0.685403	0.0244848
SNORA63	1.25827	0.0246799
SNORA50	1.56979	0.0268867
SNORA70D	0.643491	0.0274785
SNORA15	0.689158	0.0292631
SNORA30	0.820419	0.0379322
SNORA70	0.359138	0.0414825
SNORA40	0.399892	0.0436374
SNORA33	1.66874	0.0452442
SNORA34	0.712331	0.0552257
SNORA36B	-0.72679	0.0564518
SNORA10	1.75607	0.0570964
SNORA70F	0.367016	0.0585782
SNORA70C	0.47305	0.0632745
SNORA69	1.60059	0.0643835
SNORA18	0.725995	0.0652156
SNORA1	0.517066	0.0652416
SNORA80	0.732112	0.0682637
SNORA80B	2.7329	0.0730493
SNORA9	1.52121	0.0764382
SNORA5C	0.654556	0.0771311
SNORA52	0.785156	0.0846134
SNORA5A	-0.469403	0.0968349
SNORA74B	1.85263	0.0978025
SNORA73B	0.568344	0.0989197
SNORA84	1.20268	0.101215
SNORA7A	0.693004	0.102901
SNORA37	-0.591936	0.106424
SNORA3	0.770325	0.11418
SNORA59	0.626361	0.116833
SNORA31	1.24005	0.117872
SNORA67L1	1.18203	0.127664
SNORA99	0.650497	0.157974
SNORA20	1.68941	0.163359
SNORA21	1.24032	0.16443
SNORA62	0.502702	0.177331
SNORA14A	2.72746	0.179419
SNORA11DL1	0.738253	0.183224
SNORA11	0.573567	0.201036
SNORA46	0.989654	0.201454
SNORA13	0.663656	0.20224
SNORA65	0.44587	0.254772
SNORA47	-0.474961	0.314976
SNORA42	-0.485704	0.319564
SNORA17	0.734228	0.337204
SNORA55	0.331906	0.375676
SNORA14B	0.440296	0.38438
SNORA16	0.253878	0.396167
SNORA12	-0.146415	0.422892
SNORA73A	0.213531	0.464823
SNORA54	-0.56005	0.465705
SNORA56	0.584272	0.472391
SNORA19	0.291403	0.538562
SNORA71D	0.440228	0.547205
SNORA39	0.427504	0.624106
SNORA77	0.262982	0.634987
SNORA71B	0.124063	0.63581
SNORA2AL1	0.265133	0.70602
SNORA6	-0.285362	0.718558
SNORA44	0.0970432	0.814369
SNORA4	-0.0212306	0.815439
SNORA81	-0.0688591	0.834775
SNORA28	-0.0115463	0.944002
