# Supplementary material for: A single H/ACA small nucleolar RNA mediates tumor suppression downstream of oncogenic RAS
Source: eLife journal article supplement (doi:10.7554/elife.48847), 2019-09-03

Figure 2-figure supplement 2

A

Ctrl

sgRNA-24

ctccatgta**tctttgggacctgccgcctg**tggcagtcctcccttcctagccatggaagagcatgttctttgttattggc  
ctccatgtatctttgggacctgccgc-----

Ctrl

sgRNA-24

aaagctgtcaccatttcattggtaccag**attctgacttgagcaagt**gacattc  
-----tctgacttgagcaagtgacattc

B

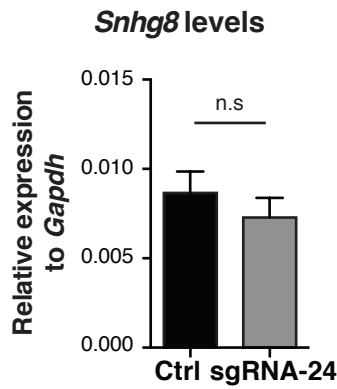

C

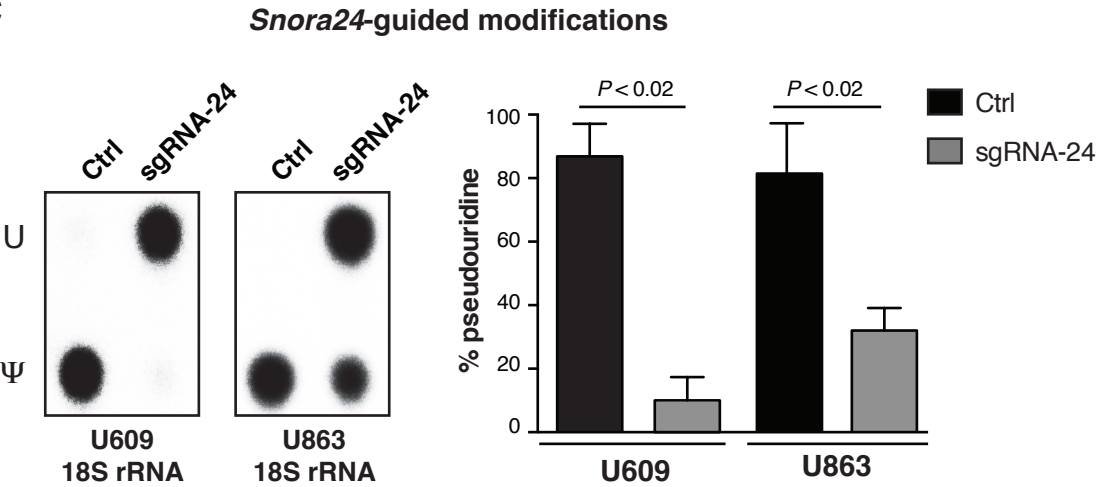

Supplement: supp [file elife_poa_e48847_Figure_2_figure_supplement_2.pdf › elife_poa_e48847_Figure_2_figure_supplement_2.pdf]
