# Supplementary material for: A single H/ACA small nucleolar RNA mediates tumor suppression downstream of oncogenic RAS
Source: eLife. 2019 Sep 3;8:e48847. doi: 10.7554/eLife.48847 (PMC6776443; doi:10.7554/eLife.48847)
Supplement: Supplementary file 1. [file elife-48847-supp1.xlsx]

## Sheet: Sheet1
Supplementary File 1. Summary of HCC patients demographics and staging
Sample ID	Age	Gender	Etiology liver disease/viral status	T stage
1	56	M	HBV/HCV	T3a
2	51	M	HBV	T1
3	24	M	Crohn's colitis (chronic immunosuppression)	T2b
4	67	M	HCV/ETOH cirrhosis	T1
5	62	F	Unknown	T2b
6	59	M	HBV/ETOH cirrhosis	T3a
7	59	M	Unknown	T2
8	58	M	HCV/ETOH cirrhosis	T2
9	62	M	HCV	T1
10	83	M	HBV	T3b
11	66	M	NASH	T1
12	58	M	HCV	T1
13	56	F	HCV	T3a
14	72	F	None	T1
15	69	M	None	T3
16	75	M	None	T1
17	54	M	None	T3
18	48	F	HBV	T1
19	70	M	None	T2
20	74	M	Unknown	T3
21	67	M	Unknown	T3
22	52	M	HCV	T2
23	53	F	Unknown	T2
24	54	M	Unknown	T1
25	65	M	HBV	T1
26	78	M	HBV	T2
27	75	M	HBV	T2
28	69	M	Unknown	T3
29	72	M	None	T1
30	60	M	Unknown	T1
31	52	M	Unknown	T4
32	70	M	Unknown	T2
33	67	F	Unknown	T2
34	46	M	Unknown	T3
35	62	M	None	T2
36	79	F	None	T3
37	70	M	HBV	T1
38	68	F	HBV	T2
39	74	M	HCV	T2
40	84	M	HBV	T1
41	67	M	HBV	T1
42	62	M	Unknown	unresectable
43	84	F	None	T3
44	56	M	HBV	T3
45	72	M	Unknown	T1
46	70	F	None	T2
47	72	M	None	T2
48	17	M	None	T3
49	68	F	None	T3
50	57	M	HBV	T1
51	72	M	HBV	T1
52	61	M	None	T1
53	58	M	HCV	T3
54	76	F	HCV	T1
55	79	M	None	T3
56	61	F	HCV	T1
57	62	M	None	T1
58	56	M	Unknown	T1
59	59	M	Unknown	T1
60	71	M	None	T1
61	72	F	Unknown	T2
62	50	M	HBV/HCV	T3
