# Supplementary material for: A single H/ACA small nucleolar RNA mediates tumor suppression downstream of oncogenic RAS
Source: eLife. 2019 Sep 3;8:e48847. doi: 10.7554/eLife.48847 (PMC6776443; doi:10.7554/eLife.48847)
Supplement: Supplementary file 2. [file elife-48847-supp2.xlsx]

## Sheet: Sheet1
Supplementary File 2. Sequences of primers used
Small RNA	Primer Sequence
Human RN7SK For	AGGGTTGATTCGGCTGATCT
Human RN7SK Rev	CTCTATCGGGGATGGTCGT
Mouse Rn7sk For	AGGGTTGATTCGGCTGATCT
Mouse Rn7sk Rev	CTCTATTCGGGGAAGGTCGT
Mouse Gapdh For	CAATGAATACGGCTACAGCAA
Mouse Gapdh Rev	AGGGAGATGCTCAGTGTTGG
Human SNHG8 For	TTGAGCCAGATGGAAGCTGA
Human SNHG8 Rev	CTTGATAGTCTTATGTTTCC
Mouse Snhg8 For	ACCACCATGTAAAGCCGA
Mouse Snhg8 Rev	CTCAACCACTACAGTACCTTAACAC
SNORA23 For	GCTGCTGTAATGTGTGCATAG
SNORA23 Rev	CGCATGATGTTTGTGTGGATAG
SNORA24 For	TCCATGTATCTTTGGGACCTG
SNORA24 Rev	TGGTGACAGCTTTGCCAATA
SNORA26 For	AGGCTAACACAGAAGGGTAAAG
SNORA26 Rev	GACTCCAGACAGGATCCAAAG
SNORA37 For	TTCACAGGTCCTCCCTCA
SNORA37 Rev	GGCAAGGATGCCAACAAAG
SNORA48 For	AGCCAGGGACAAAGCAACT
SNORA48 Rev	ATGTGTCCAAGGCATGAACC
SNORA54 For	GAGCACTGTTCGTAACCCGTTAG
SNORA54 Rev	CCACCAGTCAGTCAGTCATGTGTC
SNORA67 For	AGCAGCTTGGAATAGAATCTGG
SNORA67 Rev	CCAAGGAAGGCAGAGGAAATA
