# Supplementary figures and images for: A single H/ACA small nucleolar RNA mediates tumor suppression downstream of oncogenic RAS
Source: eLife journal article supplement (doi:10.7554/elife.48847), 2019-09-03

Figure 1-figure supplement 1

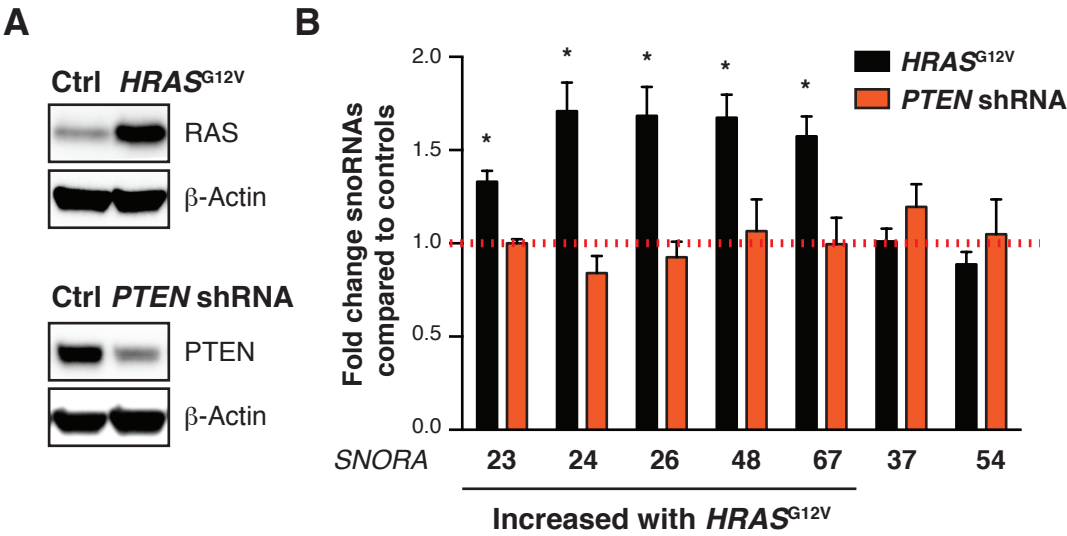

Supplement: supp [file elife_poa_e48847_Figure_1_figure_supplement_1.pdf › elife_poa_e48847_Figure_1_figure_supplement_1.pdf]

Figure 1-figure supplement 2

A

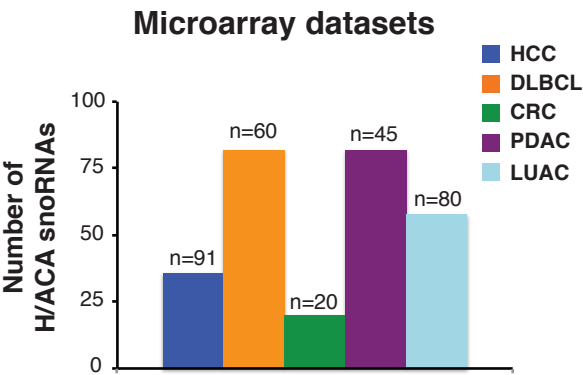

B

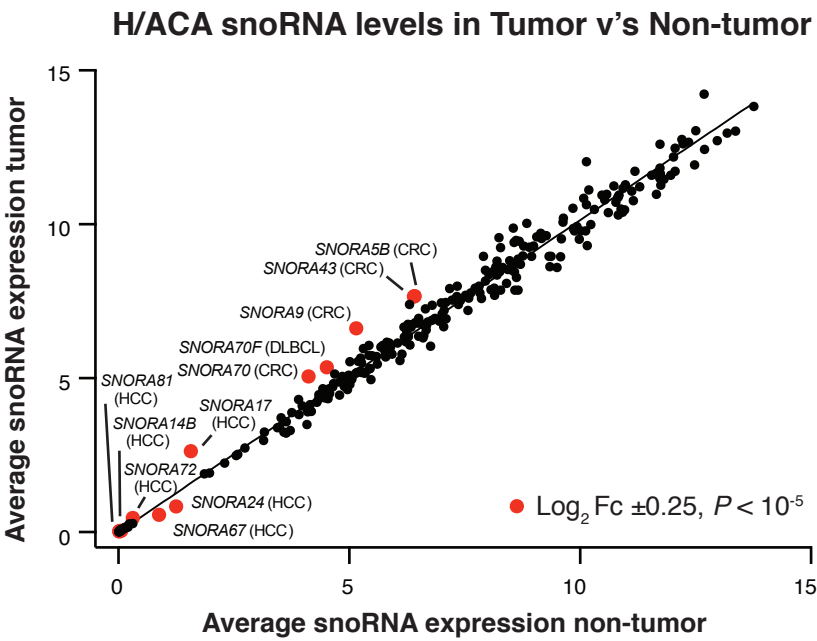

Supplement: supp [file elife_poa_e48847_Figure_1_figure_supplement_2.pdf › elife_poa_e48847_Figure_1_figure_supplement_2.pdf]

Figure 1-figure supplement 3

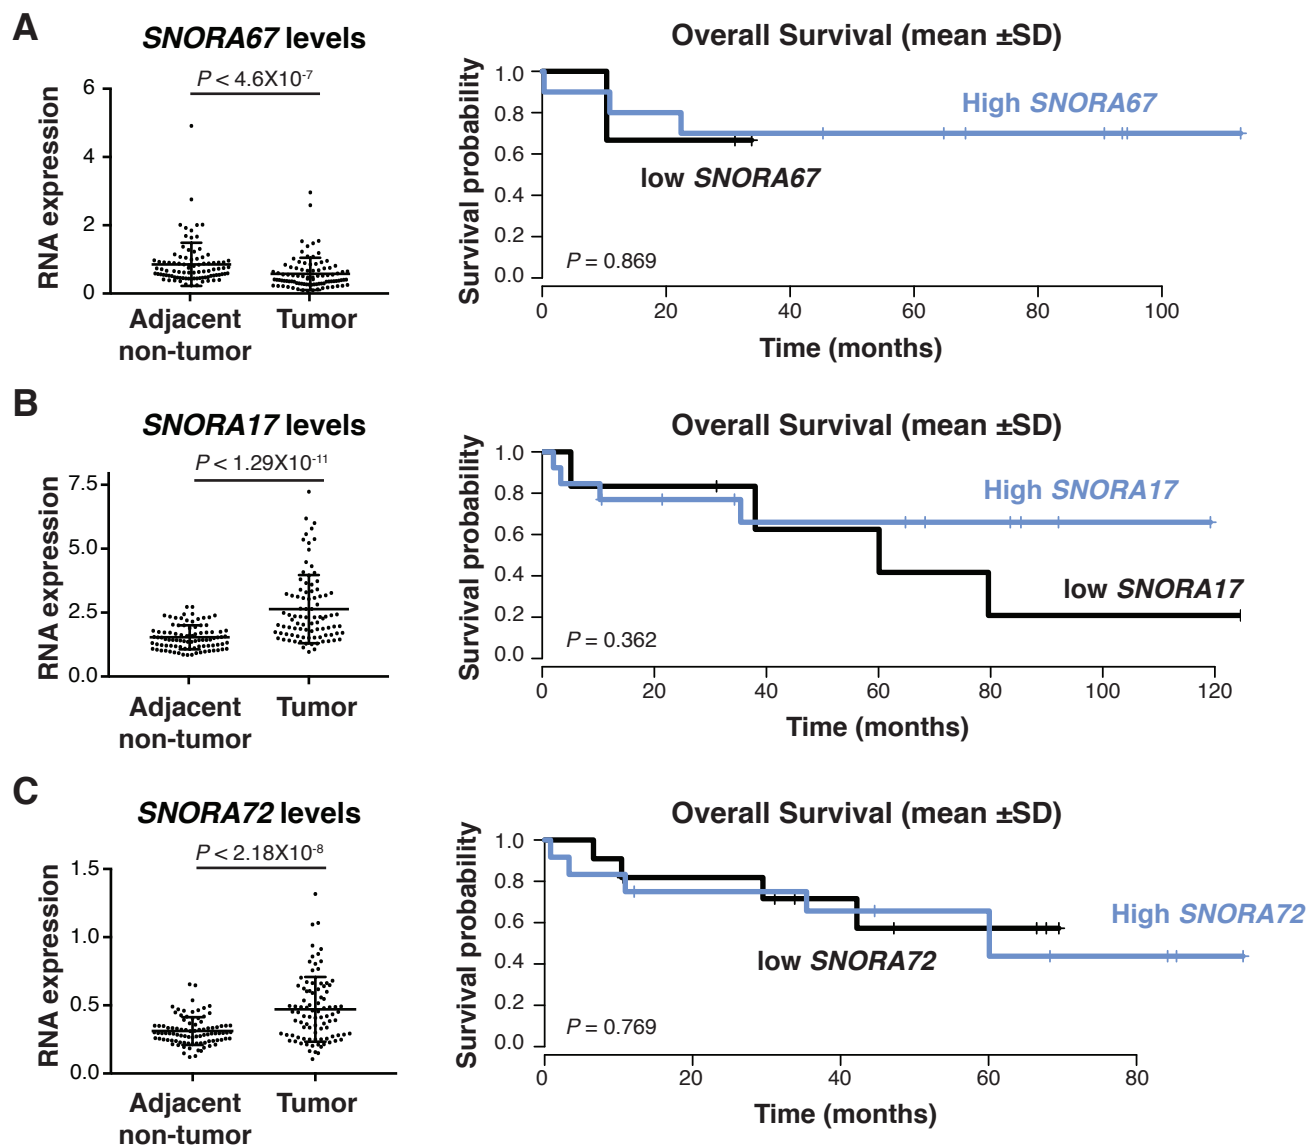

Supplement: supp [file elife_poa_e48847_Figure_1_figure_supplement_3.pdf › elife_poa_e48847_Figure_1_figure_supplement_3.pdf]

Figure 1-figure supplement 4

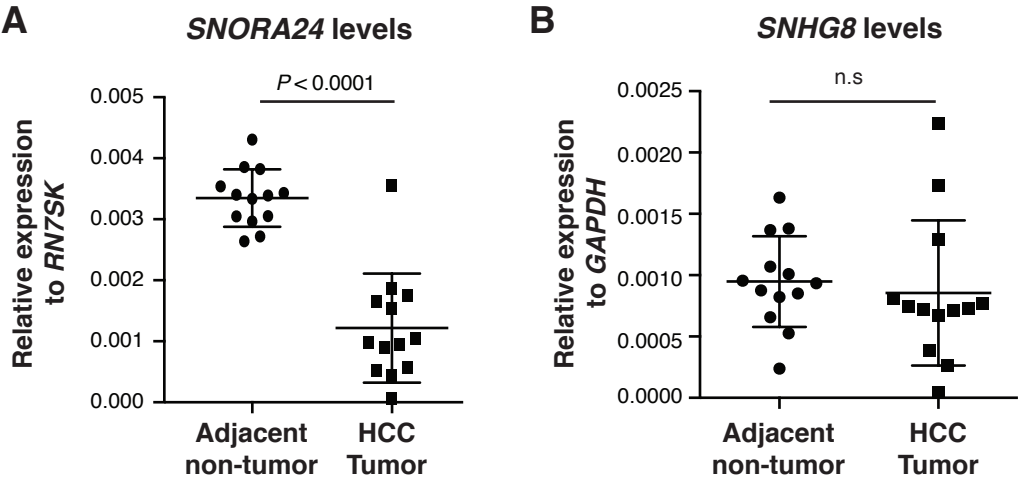

Supplement: supp [file elife_poa_e48847_Figure_1_figure_supplement_4.pdf › elife_poa_e48847_Figure_1_figure_supplement_4.pdf]

Figure 1-figure supplement 5

**A**

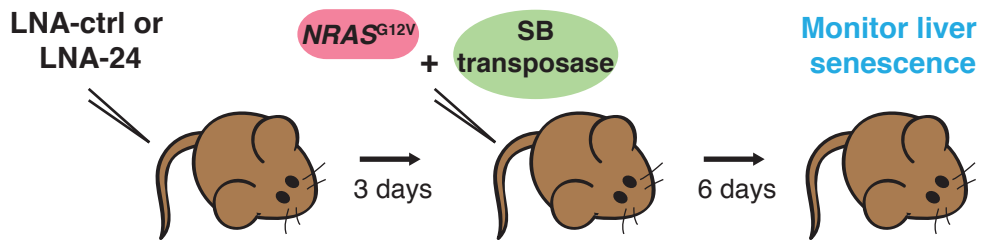

**B**

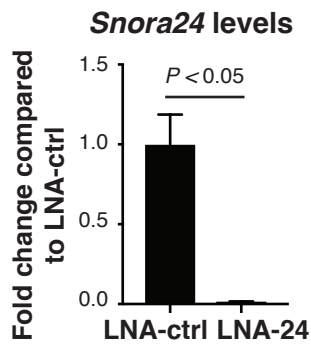

**C**

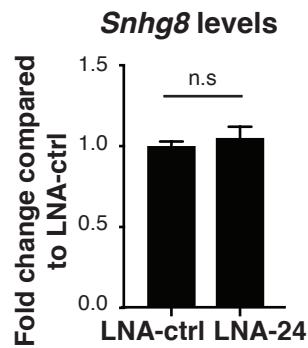

**D**

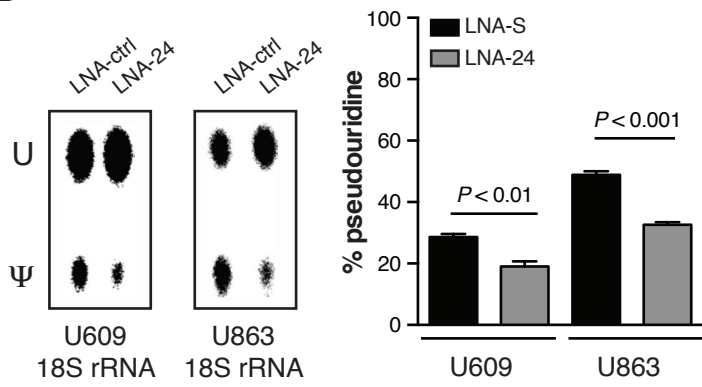

**E**

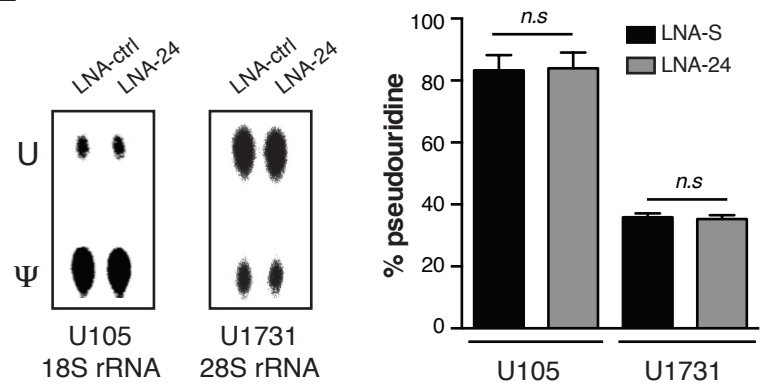

Supplement: supp [file elife_poa_e48847_Figure_1_figure_supplement_5.pdf › elife_poa_e48847_Figure_1_figure_supplement_5.pdf]

Figure 2-figure supplement 1

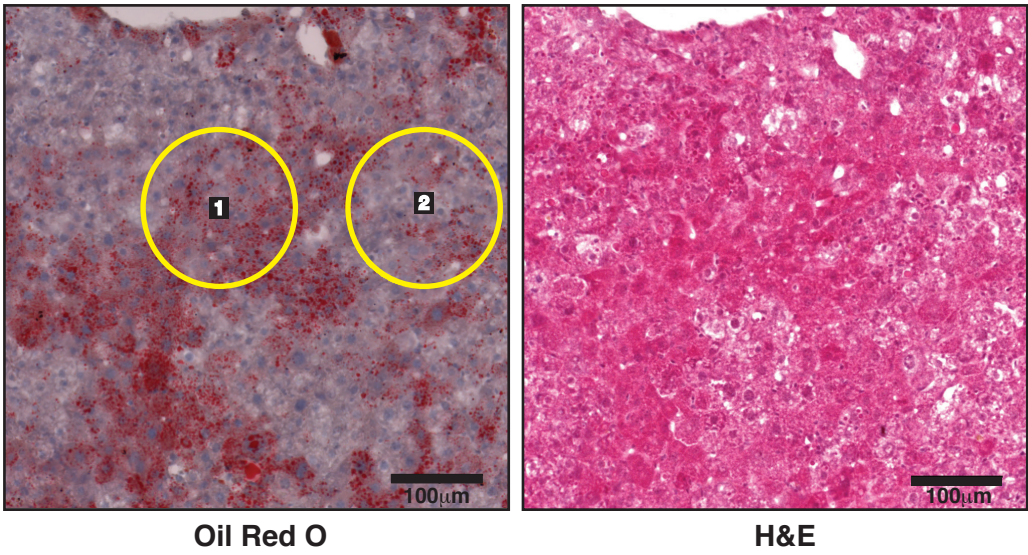

Supplement: supp [file elife_poa_e48847_Figure_2_figure_supplement_1.pdf › elife_poa_e48847_Figure_2_figure_supplement_1.pdf]

Figure 2-figure supplement 3

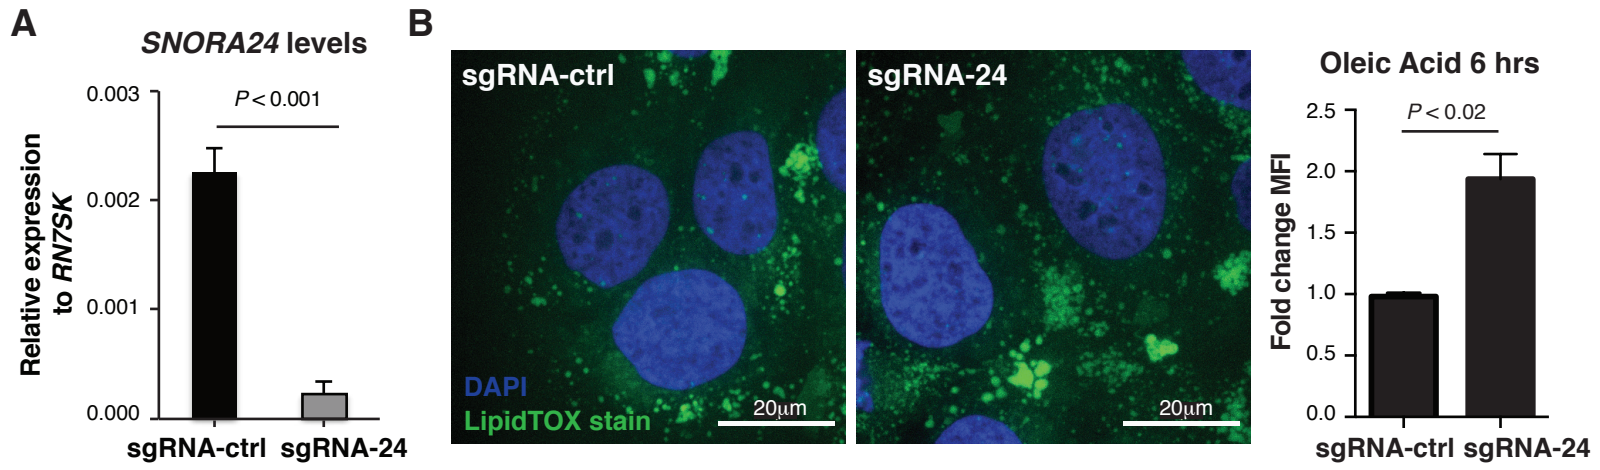

Supplement: supp [file elife_poa_e48847_Figure_2_figure_supplement_3.pdf › elife_poa_e48847_Figure_2_figure_supplement_3.pdf]

Figure 3-figure supplement 1

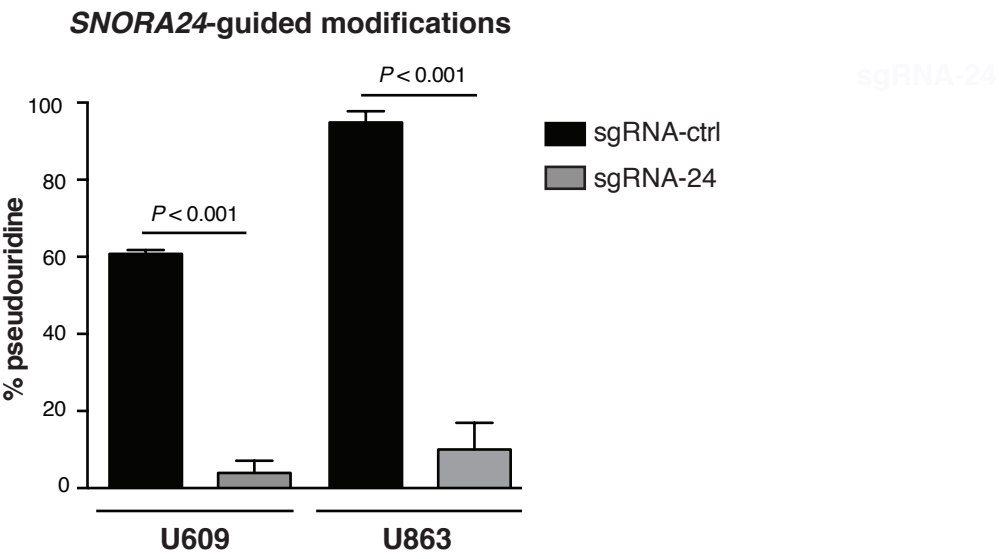

Supplement: supp [file elife_poa_e48847_Figure_3_figure_supplement_1.pdf › elife_poa_e48847_Figure_3_figure_supplement_1.pdf]

Figure 4-figure supplement 1

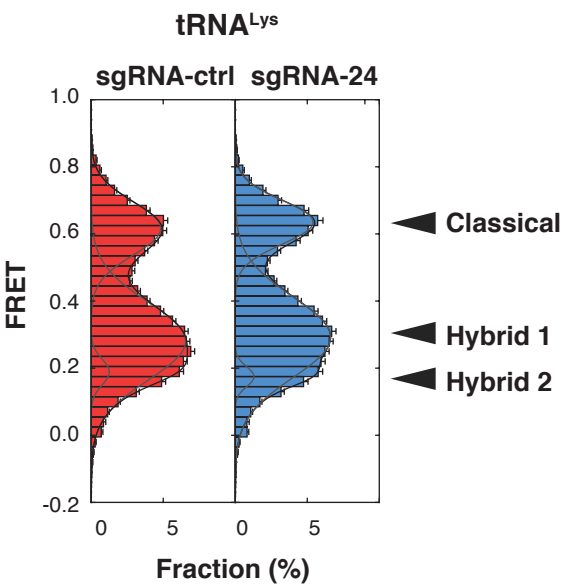

Supplement: supp [file elife_poa_e48847_Figure_4_figure_supplement_1.pdf › elife_poa_e48847_Figure_4_figure_supplement_1.pdf]

Figure 4-figure supplement 2

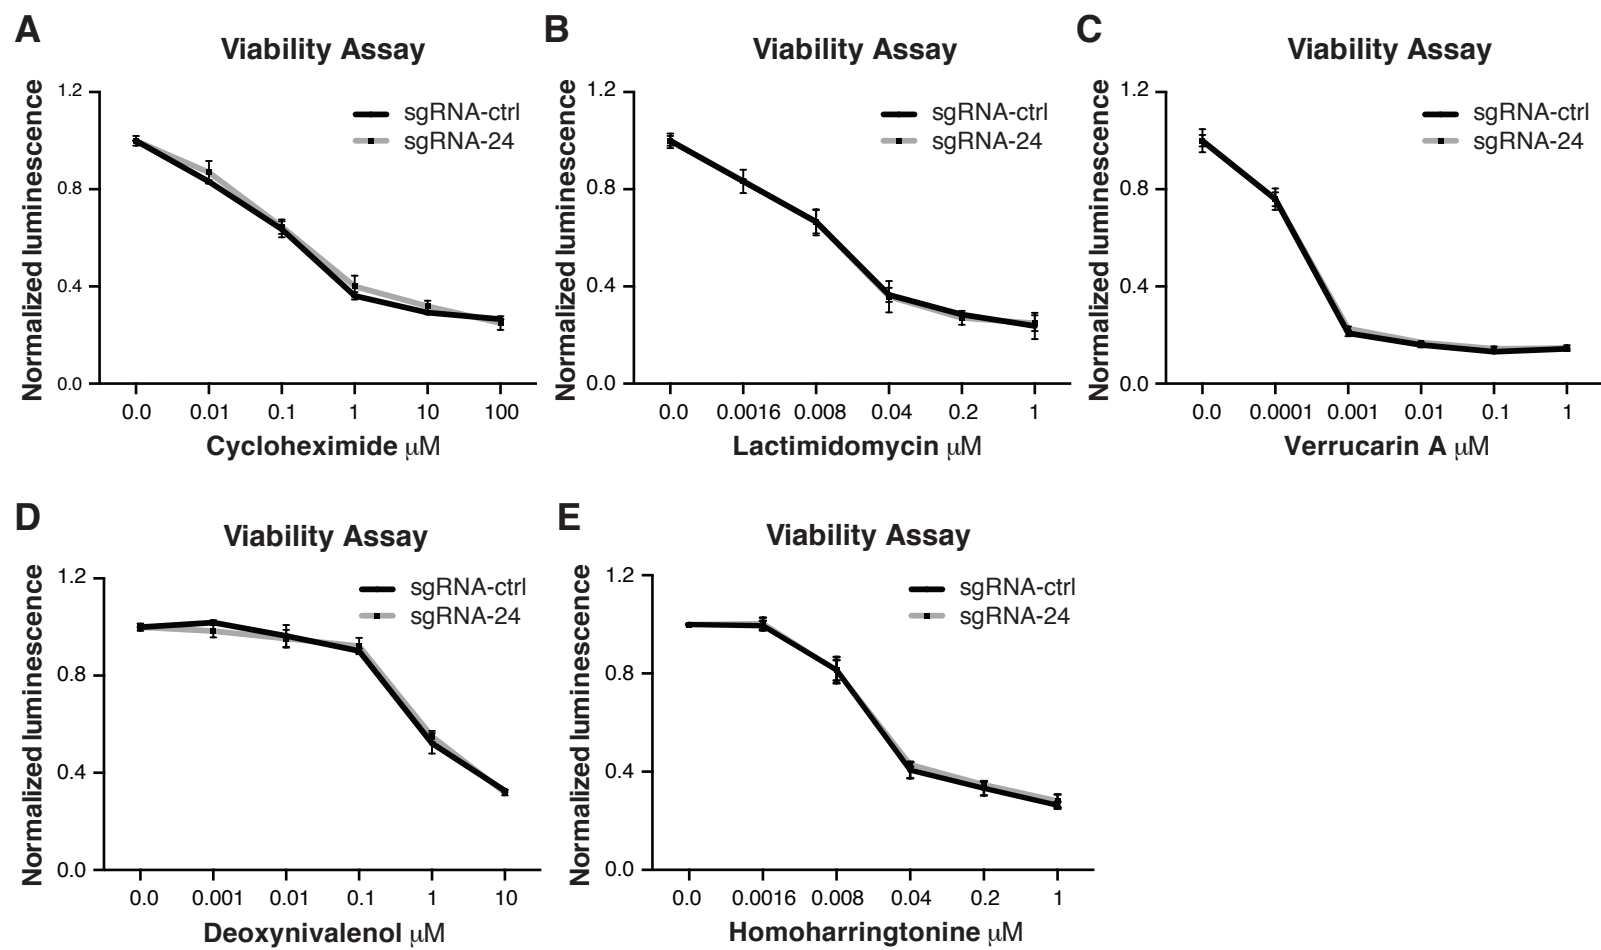

Supplement: supp [file elife_poa_e48847_Figure_4_figure_supplement_2.pdf › elife_poa_e48847_Figure_4_figure_supplement_2.pdf]
